# Supplementary material for: Transcriptome Profiling of Human Ulcerative Colitis Mucosa Reveals Altered Expression of Pathways Enriched in Genetic Susceptibility Loci
Source: PLoS One. 2014 May 1;9(5):e96153. doi: 10.1371/journal.pone.0096153 (PMC4006814; doi:10.1371/journal.pone.0096153)
Supplement: Table S2 — Rank list of Olsen biopsy data set. (XLSX) [file pone.0096153.s006.xlsx]

## Sheet: Table S2. Olsen set rank list
NAME	DESCRIPTION	GENE_SYMBOL	GENE_TITLE	SCORE
REG1A	null	null	null	21.2675
LCN2	null	null	null	19.5726
FKBP11	null	null	null	18.5125
CFB	null	null	null	18.1934
CLEC7A	null	null	null	16.6806
CXCL1	null	null	null	16.0758
KCND3	null	null	null	15.9849
REG3A	null	null	null	15.7077
CLEC4A	null	null	null	15.5868
FPR3	null	null	null	15.3677
DUOXA2	null	null	null	15.3503
DUOX2	null	null	null	15.277
NCF2	null	null	null	15.0689
S100A9	null	null	null	14.9757
CXCL2	null	null	null	14.6774
SUB1	null	null	null	14.599
IFITM3	null	null	null	14.5673
MMP12	null	null	null	14.544
FUT8	null	null	null	14.0359
IGKC	null	null	null	13.9837
ZBP1	null	null	null	13.6788
RGS18	null	null	null	13.6718
MZB1	null	null	null	13.5442
RBPMS	null	null	null	13.3885
PDZK1IP1	null	null	null	13.3365
PI3	null	null	null	13.2248
CXCL3	null	null	null	13.0658
PTAFR	null	null	null	12.9069
IGSF6	null	null	null	12.8175
TMEM165	null	null	null	12.8161
SSR4	null	null	null	12.7471
GPR34	null	null	null	12.6989
CTSB	null	null	null	12.5057
MNDA	null	null	null	12.4705
DEFA5	null	null	null	12.3842
NOS2	null	null	null	12.3727
CCL11	null	null	null	12.3576
RAB31	null	null	null	12.304
FCER1G	null	null	null	12.0531
FCRL5	null	null	null	11.8936
CHI3L1	null	null	null	11.8839
DERL3	null	null	null	11.8145
ST3GAL1	null	null	null	11.6921
PDIA4	null	null	null	11.6818
CD44	null	null	null	11.6392
TLR8	null	null	null	11.579
APIP	null	null	null	11.5657
ERLEC1	null	null	null	11.5313
PIM2	null	null	null	11.5203
CTSC	null	null	null	11.4349
S100A8	null	null	null	11.4028
SSR3	null	null	null	11.3947
ANXA1	null	null	null	11.3401
IFITM2	null	null	null	11.3381
C2	null	null	null	11.3221
TGFBI	null	null	null	11.3195
LOXL2	null	null	null	11.3134
KYNU	null	null	null	11.2718
REG1B	null	null	null	11.2024
COL1A2	null	null	null	11.1984
CD55	null	null	null	11.1703
COL6A3	null	null	null	11.1523
ENTPD1	null	null	null	11.0979
COL4A1	null	null	null	11.0898
FCGR3B	null	null	null	11.0109
CD38	null	null	null	10.9207
C4BPA	null	null	null	10.9178
ERO1L	null	null	null	10.9044
C1orf54	null	null	null	10.8945
BACE2	null	null	null	10.8513
IGLV1-44	null	null	null	10.8431
BIRC5	null	null	null	10.7591
TYROBP	null	null	null	10.6384
AIF1	null	null	null	10.6088
COL5A2	null	null	null	10.5787
TIMP1	null	null	null	10.5002
NLRP7	null	null	null	10.3668
IKBIP	null	null	null	10.3359
CKLF	null	null	null	10.325
SPARC	null	null	null	10.298
PSMA4	null	null	null	10.1623
CXCL6	null	null	null	10.1144
TRAM2	null	null	null	10.1136
ADAM9	null	null	null	10.1075
OSTC	null	null	null	10.1071
RCN2	null	null	null	10.1027
WARS	null	null	null	10.0817
IFI30	null	null	null	10.078
LY96	null	null	null	10.0459
SRD5A3	null	null	null	10.0448
C4orf3	null	null	null	10.0231
CSF1R	null	null	null	9.92361
NFKBIZ	null	null	null	9.907
COL1A1	null	null	null	9.89948
SPCS3	null	null	null	9.87519
PECAM1	null	null	null	9.86727
PLA2G7	null	null	null	9.8404
EMR2	null	null	null	9.82624
TNIP3	null	null	null	9.79629
L1TD1	null	null	null	9.79051
MORF4L1	null	null	null	9.77448
CALU	null	null	null	9.72644
TRAM1	null	null	null	9.72155
IL8	null	null	null	9.71286
ANKRD36BP2	null	null	null	9.7117
SLC6A14	null	null	null	9.64504
ANXA5	null	null	null	9.59634
BNIP3L	null	null	null	9.5801
CHST11	null	null	null	9.57028
ARNTL2	null	null	null	9.55964
PILRA	null	null	null	9.55487
SORD	null	null	null	9.53669
HSPA13	null	null	null	9.45783
SEC11C	null	null	null	9.45356
LGALS1	null	null	null	9.45176
OAZ2	null	null	null	9.44236
TXNDC15	null	null	null	9.41206
GBP1	null	null	null	9.36181
SCD	null	null	null	9.35738
ZC3H12A	null	null	null	9.35476
LYN	null	null	null	9.33335
FAM92A1	null	null	null	9.29114
C1QB	null	null	null	9.27157
LILRB2	null	null	null	9.2668
LIPA	null	null	null	9.20152
MEI1	null	null	null	9.18574
COL3A1	null	null	null	9.18218
CDV3	null	null	null	9.17671
UBE2J1	null	null	null	9.10896
PPP2R5C	null	null	null	9.09257
F2R	null	null	null	9.08994
S100A13	null	null	null	9.08751
SLAMF7	null	null	null	9.08633
PPIB	null	null	null	9.07096
HERPUD1	null	null	null	9.06956
SEL1L3	null	null	null	9.06038
SRGN	null	null	null	9.05923
C4BPB	null	null	null	9.05786
LOC96610	null	null	null	9.05004
IGHD	null	null	null	9.03534
LRRC25	null	null	null	9.03144
MALAT1	null	null	null	9.02726
TMF1	null	null	null	8.99929
OSBPL3	null	null	null	8.98324
OST4	null	null	null	8.95668
MS4A6A	null	null	null	8.92832
SFMBT2	null	null	null	8.92667
SAMD9L	null	null	null	8.91731
NID1	null	null	null	8.91376
JAK2	null	null	null	8.86796
PRKAR1A	null	null	null	8.86289
RBX1	null	null	null	8.85898
IGK@	null	null	null	8.85255
PCSK9	null	null	null	8.82528
CASP4	null	null	null	8.81077
SKA2	null	null	null	8.79003
MMP3	null	null	null	8.78724
P2RY13	null	null	null	8.76488
C3AR1	null	null	null	8.75952
IRF1	null	null	null	8.75284
FAM46C	null	null	null	8.7487
IGHG1	null	null	null	8.74604
ASS1	null	null	null	8.73273
MSI2	null	null	null	8.69412
PRDX4	null	null	null	8.681
SAT1	null	null	null	8.67461
LAX1	null	null	null	8.66084
FSTL1	null	null	null	8.65338
TYMP	null	null	null	8.64784
GSTO1	null	null	null	8.62389
OAS2	null	null	null	8.59917
TMEM45A	null	null	null	8.58694
SPINK4	null	null	null	8.53753
STAT1	null	null	null	8.53363
IGHM	null	null	null	8.52162
IGFBP7	null	null	null	8.44975
CYBB	null	null	null	8.41867
GPX8	null	null	null	8.39588
IGLJ3	null	null	null	8.37706
RECQL	null	null	null	8.3218
PDK1	null	null	null	8.3145
RIT1	null	null	null	8.29011
C1QA	null	null	null	8.28809
COL5A1	null	null	null	8.27467
IGHV3-48	null	null	null	8.24924
FOXQ1	null	null	null	8.24203
SCPEP1	null	null	null	8.23583
NT5DC2	null	null	null	8.23219
IFITM1	null	null	null	8.18033
FBXO16	null	null	null	8.15959
UBE2L6	null	null	null	8.15581
GZMB	null	null	null	8.13561
ABCC1	null	null	null	8.13125
NRP1	null	null	null	8.12891
BHLHE40	null	null	null	8.11974
CD86	null	null	null	8.10862
VCP	null	null	null	8.06326
BUB1	null	null	null	8.05585
PRDM1	null	null	null	8.0507
IGLL5	null	null	null	8.04696
GOLT1B	null	null	null	8.04476
PXDN	null	null	null	8.03579
JAK1	null	null	null	8.03012
TNFRSF17	null	null	null	8.00447
NUSAP1	null	null	null	7.99775
HEG1	null	null	null	7.98626
CXCL11	null	null	null	7.9734
CTSK	null	null	null	7.97292
MS4A4A	null	null	null	7.96627
HLA-E	null	null	null	7.95835
WISP1	null	null	null	7.94974
PML	null	null	null	7.94808
TMC5	null	null	null	7.94802
SIRPA	null	null	null	7.94057
ETV5	null	null	null	7.93547
GM2A	null	null	null	7.91315
KCNN3	null	null	null	7.91253
SLC29A1	null	null	null	7.88451
DNAJB9	null	null	null	7.87915
ARPC1B	null	null	null	7.87849
LPCAT1	null	null	null	7.87381
CD74	null	null	null	7.8693
PROCR	null	null	null	7.86821
DOCK4	null	null	null	7.85367
ADM	null	null	null	7.85221
CFI	null	null	null	7.84397
SEL1L	null	null	null	7.83651
RNF213	null	null	null	7.8107
CXCR2	null	null	null	7.79931
PTTG1	null	null	null	7.78465
GPX1	null	null	null	7.77973
CDKN3	null	null	null	7.77843
PSG3	null	null	null	7.75999
TGM2	null	null	null	7.75354
FOLR1	null	null	null	7.75064
TAP1	null	null	null	7.71624
DMBT1	null	null	null	7.70886
GNB1	null	null	null	7.70459
GALNT2	null	null	null	7.69391
FPR1	null	null	null	7.68663
KLHL5	null	null	null	7.67545
HAVCR2	null	null	null	7.67044
AKIRIN2	null	null	null	7.64877
NAIP	null	null	null	7.64152
B9D1	null	null	null	7.63233
AGTRAP	null	null	null	7.62111
CXCL10	null	null	null	7.61784
CDK1	null	null	null	7.61223
SPATS2	null	null	null	7.60683
VNN1	null	null	null	7.60564
PKM	null	null	null	7.5994
CHST2	null	null	null	7.59414
CTHRC1	null	null	null	7.58868
ELL2	null	null	null	7.58563
SSR1	null	null	null	7.57651
MS4A7	null	null	null	7.56854
ST8SIA4	null	null	null	7.56689
MME	null	null	null	7.55986
SIGLEC7	null	null	null	7.55639
CCDC104	null	null	null	7.55629
TTYH3	null	null	null	7.5558
LPIN1	null	null	null	7.55559
STAT3	null	null	null	7.55348
VCAN	null	null	null	7.55128
SUMO3	null	null	null	7.53131
TPK1	null	null	null	7.52912
ISG20	null	null	null	7.52494
PSMB10	null	null	null	7.52347
C1GALT1C1	null	null	null	7.50657
LOC100505687	null	null	null	7.50085
SLAMF8	null	null	null	7.49727
CADM1	null	null	null	7.46881
SLC7A7	null	null	null	7.46526
TRNAU1AP	null	null	null	7.46406
CCR1	null	null	null	7.46256
CHST15	null	null	null	7.457
GLCCI1	null	null	null	7.45247
ADAMTS2	null	null	null	7.4412
GRINA	null	null	null	7.43985
HLA-DPA1	null	null	null	7.43025
FNDC3B	null	null	null	7.40214
STOM	null	null	null	7.39724
CEP128	null	null	null	7.38089
SLC43A3	null	null	null	7.37887
CARHSP1	null	null	null	7.37853
CD300LF	null	null	null	7.36202
CCR2	null	null	null	7.35602
ASAP1	null	null	null	7.35396
HK3	null	null	null	7.34721
CXCL9	null	null	null	7.31701
TLR4	null	null	null	7.30997
MMP7	null	null	null	7.30507
SERPINA1	null	null	null	7.30408
NXPE3	null	null	null	7.29573
NAMPT	null	null	null	7.28876
RHOQ	null	null	null	7.2828
CASP5	null	null	null	7.27507
PRF1	null	null	null	7.2719
DUSP10	null	null	null	7.27119
EDEM2	null	null	null	7.26986
GPR116	null	null	null	7.26884
IRF4	null	null	null	7.25174
CD47	null	null	null	7.237
CASP10	null	null	null	7.23484
QKI	null	null	null	7.23113
DAPP1	null	null	null	7.22894
APOL1	null	null	null	7.22547
CRELD2	null	null	null	7.22384
SNRPG	null	null	null	7.21134
PPAPDC1B	null	null	null	7.20178
SLC15A3	null	null	null	7.19522
BBIP1	null	null	null	7.19019
AKR1A1	null	null	null	7.18295
GMDS	null	null	null	7.17516
COL4A2	null	null	null	7.17421
IRAK3	null	null	null	7.17146
SPAG4	null	null	null	7.1685
THEMIS2	null	null	null	7.16565
IDO1	null	null	null	7.16163
PLAU	null	null	null	7.15443
CLDN2	null	null	null	7.1424
NPHP1	null	null	null	7.14064
TLR1	null	null	null	7.13417
GNAI2	null	null	null	7.13221
EAF2	null	null	null	7.12884
FCGR2A	null	null	null	7.1259
C1QC	null	null	null	7.09933
HLA-DQB1	null	null	null	7.09556
SAMHD1	null	null	null	7.09259
SAMSN1	null	null	null	7.09122
FUT11	null	null	null	7.09097
CD274	null	null	null	7.08393
SRP54	null	null	null	7.0825
LST1	null	null	null	7.08157
NUCB2	null	null	null	7.07852
ARL3	null	null	null	7.07664
HCK	null	null	null	7.07315
FCGR2C	null	null	null	7.06709
HLA-DMA	null	null	null	7.06682
VSNL1	null	null	null	7.06269
PLXNC1	null	null	null	7.0609
CALCRL	null	null	null	7.05385
MIF	null	null	null	7.04901
SRGAP2C	null	null	null	7.04642
FGFR1OP2	null	null	null	7.02869
PDIA3	null	null	null	7.02287
ACP5	null	null	null	7.02171
PSME2	null	null	null	7.01478
VAMP4	null	null	null	7.01285
MMP25	null	null	null	7.00396
GJC1	null	null	null	7.00303
THY1	null	null	null	7.00275
ANP32E	null	null	null	7.00263
DEFA6	null	null	null	6.96974
STAT2	null	null	null	6.96496
ATP6V1F	null	null	null	6.96288
LAMC1	null	null	null	6.96282
MCEE	null	null	null	6.93985
SMOC2	null	null	null	6.92955
COBLL1	null	null	null	6.92901
FBN1	null	null	null	6.91707
CEP55	null	null	null	6.90787
PSMB8	null	null	null	6.90747
TPM4	null	null	null	6.89501
HLA-DRA	null	null	null	6.89054
MMP14	null	null	null	6.88399
CD300A	null	null	null	6.87869
LATS2	null	null	null	6.87835
CBX3	null	null	null	6.86784
CFLAR	null	null	null	6.86783
IGLC1	null	null	null	6.8646
PDPN	null	null	null	6.86203
RABAC1	null	null	null	6.84832
ARMCX3	null	null	null	6.84232
GLRX	null	null	null	6.83595
CCL4	null	null	null	6.82531
IL12RB1	null	null	null	6.82252
UROD	null	null	null	6.81916
GLIPR1	null	null	null	6.80983
H2AFZ	null	null	null	6.8098
IDH2	null	null	null	6.80852
PCDH17	null	null	null	6.80763
RABL5	null	null	null	6.8076
EXOC6	null	null	null	6.79764
CDC25B	null	null	null	6.78042
TMEM258	null	null	null	6.77847
PGD	null	null	null	6.7777
COPE	null	null	null	6.76828
CYYR1	null	null	null	6.76799
ADAMTS5	null	null	null	6.76198
CMKLR1	null	null	null	6.7516
PARP14	null	null	null	6.74717
PEA15	null	null	null	6.74032
SLFN11	null	null	null	6.7364
CLEC2B	null	null	null	6.73214
TOP2A	null	null	null	6.73127
GBP5	null	null	null	6.70033
FZD2	null	null	null	6.70001
TFEC	null	null	null	6.69801
SELP	null	null	null	6.69655
INSC	null	null	null	6.68483
RRM2	null	null	null	6.68348
HSP90B1	null	null	null	6.67676
TRIM69	null	null	null	6.66468
RGCC	null	null	null	6.6638
CLDND1	null	null	null	6.64107
COL6A1	null	null	null	6.63393
AZGP1	null	null	null	6.62637
VWF	null	null	null	6.62419
TAPBPL	null	null	null	6.62202
BIRC3	null	null	null	6.6202
PLEK	null	null	null	6.61632
FAM49A	null	null	null	6.60697
STT3A	null	null	null	6.59257
ANKRD36B	null	null	null	6.59178
LYZ	null	null	null	6.58915
RPN2	null	null	null	6.58038
AKR1B1	null	null	null	6.5773
TMEM107	null	null	null	6.57725
MCFD2	null	null	null	6.57699
AGT	null	null	null	6.55618
ATP11A	null	null	null	6.55535
ORAI2	null	null	null	6.55361
CD82	null	null	null	6.5497
PSMB9	null	null	null	6.54254
GBP2	null	null	null	6.53758
RTEL1	null	null	null	6.52698
PSMB2	null	null	null	6.52322
ACPP	null	null	null	6.51697
PLSCR1	null	null	null	6.5104
CCSER2	null	null	null	6.5092
SLC40A1	null	null	null	6.50865
FBXO6	null	null	null	6.49177
TLN1	null	null	null	6.48885
CALR	null	null	null	6.48355
PRDX1	null	null	null	6.48282
TMED2	null	null	null	6.4729
CCDC109B	null	null	null	6.4664
PCMTD1	null	null	null	6.4635
ANKRD36	null	null	null	6.46096
ACSL4	null	null	null	6.45271
PHTF1	null	null	null	6.44989
FAM26F	null	null	null	6.44795
IGFBP5	null	null	null	6.44761
CNPY2	null	null	null	6.44279
MSN	null	null	null	6.43636
TCN1	null	null	null	6.42921
GSTP1	null	null	null	6.42646
CLDN1	null	null	null	6.4219
VNN2	null	null	null	6.42175
UBE2C	null	null	null	6.42007
LAIR1	null	null	null	6.41751
APH1B	null	null	null	6.40847
CA8	null	null	null	6.40044
IQCG	null	null	null	6.39665
SH3GLB1	null	null	null	6.3941
OLFML2B	null	null	null	6.39278
ABCA12	null	null	null	6.39205
ATP6V1B2	null	null	null	6.39119
WNT5A	null	null	null	6.38385
LEPROTL1	null	null	null	6.38374
PLS3	null	null	null	6.37735
ZAK	null	null	null	6.36687
CSNK1A1	null	null	null	6.35726
CD209	null	null	null	6.35683
GPR171	null	null	null	6.35616
KIAA1033	null	null	null	6.34959
GK	null	null	null	6.34398
DCUN1D1	null	null	null	6.33409
FNDC3A	null	null	null	6.3233
DNASE2	null	null	null	6.31243
IL13RA2	null	null	null	6.31031
CSF2RB	null	null	null	6.30831
EMP3	null	null	null	6.30652
PRR16	null	null	null	6.30471
GLT8D2	null	null	null	6.30034
HMGB1	null	null	null	6.29906
CASP1	null	null	null	6.29876
DEGS1	null	null	null	6.28986
SOD1	null	null	null	6.28901
IFI35	null	null	null	6.28717
SLC7A5	null	null	null	6.27943
PLXND1	null	null	null	6.27243
APOC1	null	null	null	6.27102
FYB	null	null	null	6.26233
PARP9	null	null	null	6.26105
DERL1	null	null	null	6.25988
HM13	null	null	null	6.25792
TMED9	null	null	null	6.2564
NFAM1	null	null	null	6.25027
SLC6A6	null	null	null	6.2398
MAFB	null	null	null	6.23344
PSMA3	null	null	null	6.20962
PRPS1	null	null	null	6.20057
ZNFX1	null	null	null	6.19783
PIK3R3	null	null	null	6.1959
CPEB4	null	null	null	6.19398
NPC2	null	null	null	6.18696
SEC14L1	null	null	null	6.18237
MMP2	null	null	null	6.18218
CDH11	null	null	null	6.17574
RAB2A	null	null	null	6.1746
CARD16	null	null	null	6.17096
CHURC1	null	null	null	6.15472
BLVRA	null	null	null	6.15122
SHFM1	null	null	null	6.15013
VIM	null	null	null	6.14626
PSMB4	null	null	null	6.14542
PHLDA1	null	null	null	6.14288
DNAJC1	null	null	null	6.13717
ITGA8	null	null	null	6.13709
CYBA	null	null	null	6.13329
RIPK2	null	null	null	6.13177
KDR	null	null	null	6.13108
GPNMB	null	null	null	6.12796
NDC80	null	null	null	6.12704
CD59	null	null	null	6.12662
PCMT1	null	null	null	6.12613
PDE4B	null	null	null	6.11983
KCNJ15	null	null	null	6.11832
DNAJC10	null	null	null	6.10647
RGS5	null	null	null	6.09368
CSF2RA	null	null	null	6.09354
HIF1A	null	null	null	6.09016
EHD3	null	null	null	6.08795
ADAP2	null	null	null	6.08596
PSENEN	null	null	null	6.08577
MUC1	null	null	null	6.07664
PDIA5	null	null	null	6.07622
CCNB1	null	null	null	6.0756
ARMC9	null	null	null	6.07506
ADAM28	null	null	null	6.07035
FEZ1	null	null	null	6.06823
KLF7	null	null	null	6.06696
NMI	null	null	null	6.06134
ST3GAL2	null	null	null	6.05965
FAM3B	null	null	null	6.0563
VAMP5	null	null	null	6.05523
ECM1	null	null	null	6.05058
ALDH1A2	null	null	null	6.0466
USP18	null	null	null	6.04035
ATG13	null	null	null	6.03973
HSH2D	null	null	null	6.03718
CCL20	null	null	null	6.03486
DRAM1	null	null	null	6.02664
GTSE1	null	null	null	6.02562
ASPH	null	null	null	6.01466
TMEM39A	null	null	null	6.01228
KIF20A	null	null	null	6.01182
TRIB2	null	null	null	6.0088
CYP4X1	null	null	null	6.00488
IL18BP	null	null	null	6.00449
SEC24A	null	null	null	6.00422
SCD5	null	null	null	6.00396
LDHB	null	null	null	6.00033
IL1B	null	null	null	5.99582
KIF14	null	null	null	5.98757
APOL2	null	null	null	5.98699
NINJ2	null	null	null	5.97221
ASRGL1	null	null	null	5.97114
CCDC69	null	null	null	5.96759
TNFSF13	null	null	null	5.96741
BMPR2	null	null	null	5.96671
CCNA2	null	null	null	5.96505
CBR3	null	null	null	5.96237
PHF19	null	null	null	5.96018
YIPF5	null	null	null	5.95748
NONO	null	null	null	5.94743
ARPC5	null	null	null	5.94014
CD68	null	null	null	5.93772
TMEM106A	null	null	null	5.93708
MAGED1	null	null	null	5.93211
CHRM3	null	null	null	5.93044
BGN	null	null	null	5.91831
CROCCP2	null	null	null	5.91718
FTL	null	null	null	5.9168
KDELC1	null	null	null	5.91579
KDELR3	null	null	null	5.91503
RNF24	null	null	null	5.91474
TM6SF1	null	null	null	5.91258
TFPI	null	null	null	5.90969
NEK2	null	null	null	5.90805
HELB	null	null	null	5.90797
IGLV6-57	null	null	null	5.90579
IGLL3P	null	null	null	5.89906
GLG1	null	null	null	5.89645
CD163	null	null	null	5.89039
CSGALNACT1	null	null	null	5.88682
SERPINB6	null	null	null	5.88653
PPA2	null	null	null	5.88491
MYO5A	null	null	null	5.8844
CDC27	null	null	null	5.8812
USO1	null	null	null	5.87898
PSME1	null	null	null	5.87617
TM9SF4	null	null	null	5.87486
RAB27A	null	null	null	5.87367
PHF20	null	null	null	5.8735
CPXM1	null	null	null	5.86615
ENG	null	null	null	5.86108
PRAF2	null	null	null	5.8576
HLA-DRB6	null	null	null	5.85322
LIMS1	null	null	null	5.84905
ELL	null	null	null	5.84371
PDIA6	null	null	null	5.83449
GUSBP11	null	null	null	5.81796
SULF1	null	null	null	5.81361
HSPB11	null	null	null	5.81324
ZEB1	null	null	null	5.80985
XBP1	null	null	null	5.80955
PGM3	null	null	null	5.80946
XDH	null	null	null	5.80676
VWA1	null	null	null	5.80407
RNASE6	null	null	null	5.80273
POU2AF1	null	null	null	5.79475
GUK1	null	null	null	5.789
LSS	null	null	null	5.78426
RAB27B	null	null	null	5.78373
GPR126	null	null	null	5.7818
RBM14	null	null	null	5.77773
GPR155	null	null	null	5.76585
CENPW	null	null	null	5.76353
CMTM6	null	null	null	5.76152
RGS2	null	null	null	5.74879
LMO7	null	null	null	5.74481
PARVB	null	null	null	5.73327
PSMD10	null	null	null	5.73134
C19orf10	null	null	null	5.72533
LAMA2	null	null	null	5.724
MBNL2	null	null	null	5.72171
UGGT1	null	null	null	5.72136
CD40	null	null	null	5.72127
TIFA	null	null	null	5.71964
LILRA2	null	null	null	5.71639
MAD2L1	null	null	null	5.70893
FCGR1B	null	null	null	5.70554
CAP1	null	null	null	5.70541
SOGA2	null	null	null	5.70398
CEBPB	null	null	null	5.70202
MRC1	null	null	null	5.69927
CYSLTR1	null	null	null	5.69659
ADRBK2	null	null	null	5.69269
ITGB2	null	null	null	5.69095
PPP1R12A	null	null	null	5.68931
PSMC2	null	null	null	5.68222
ANLN	null	null	null	5.67449
PLAUR	null	null	null	5.67425
MPEG1	null	null	null	5.67105
SNPH	null	null	null	5.66771
MMP10	null	null	null	5.66085
SAR1A	null	null	null	5.65998
TNFAIP8L1	null	null	null	5.65726
TMEM158	null	null	null	5.65578
BUB3	null	null	null	5.65404
DLGAP5	null	null	null	5.64972
CTSL1	null	null	null	5.64839
C1R	null	null	null	5.64781
VMP1	null	null	null	5.64067
ITGAV	null	null	null	5.63932
C11orf73	null	null	null	5.63384
BET1	null	null	null	5.62117
SOCS1	null	null	null	5.61978
TPST2	null	null	null	5.60298
SMC4	null	null	null	5.60056
SLC50A1	null	null	null	5.60013
ADA	null	null	null	5.58907
CXorf21	null	null	null	5.58847
ACVR1	null	null	null	5.5858
IFI27L2	null	null	null	5.58502
RNF181	null	null	null	5.5821
ANKRD12	null	null	null	5.58029
EFHD2	null	null	null	5.57877
ALDOB	null	null	null	5.57854
FAM167B	null	null	null	5.57697
SELM	null	null	null	5.5758
CBFB	null	null	null	5.57573
EMP2	null	null	null	5.57447
ELTD1	null	null	null	5.5743
MANEA	null	null	null	5.57273
FBLN5	null	null	null	5.57254
COL23A1	null	null	null	5.57178
BNIP3	null	null	null	5.57083
PPP2R2A	null	null	null	5.56656
PF4	null	null	null	5.56618
CPVL	null	null	null	5.56372
LOC100507535	null	null	null	5.56114
CLIP1	null	null	null	5.56004
IL2RA	null	null	null	5.54741
SLC38A10	null	null	null	5.54392
RB1	null	null	null	5.543
HAPLN3	null	null	null	5.53378
EVI2B	null	null	null	5.53333
BCL6	null	null	null	5.53102
SNCAIP	null	null	null	5.52927
NUF2	null	null	null	5.52596
CREB3L2	null	null	null	5.5259
DLEU2	null	null	null	5.52146
LILRB1	null	null	null	5.51938
EID1	null	null	null	5.5179
EMR1	null	null	null	5.51728
PODXL	null	null	null	5.51325
DPYSL3	null	null	null	5.51119
RARRES3	null	null	null	5.50936
LAYN	null	null	null	5.50447
PLD3	null	null	null	5.50415
ATG7	null	null	null	5.50099
PHGDH	null	null	null	5.49966
HLA-DMB	null	null	null	5.49337
SEC24D	null	null	null	5.49195
LCP2	null	null	null	5.48658
SIGLEC10	null	null	null	5.48505
LRP8	null	null	null	5.48263
MGP	null	null	null	5.48178
PLEKHS1	null	null	null	5.48062
GMPR	null	null	null	5.47568
SLC25A37	null	null	null	5.47102
IFIT3	null	null	null	5.47035
KIF2C	null	null	null	5.46951
MAPKAPK2	null	null	null	5.46859
SLC38A6	null	null	null	5.46702
NCAPG	null	null	null	5.46461
G6PD	null	null	null	5.46028
C6orf223	null	null	null	5.45596
C1S	null	null	null	5.45586
BCLAF1	null	null	null	5.45346
BST2	null	null	null	5.45339
TOR3A	null	null	null	5.44814
LOC387895	null	null	null	5.44728
NCF4	null	null	null	5.44716
SUMO2	null	null	null	5.42326
FAM83A	null	null	null	5.42099
ASCC1	null	null	null	5.41904
ARSB	null	null	null	5.41647
BTG2	null	null	null	5.41436
GALNT6	null	null	null	5.4131
SELK	null	null	null	5.40947
MMP1	null	null	null	5.40885
CSF3R	null	null	null	5.39884
SERPINI1	null	null	null	5.39161
TNFRSF10C	null	null	null	5.39093
ODF3B	null	null	null	5.39083
PSMA1	null	null	null	5.38042
SRGAP2B	null	null	null	5.37746
HID1	null	null	null	5.37601
RPL39L	null	null	null	5.37482
NCOA3	null	null	null	5.36956
EPB41L2	null	null	null	5.36901
PIK3R5	null	null	null	5.36816
ITM2A	null	null	null	5.36606
CALD1	null	null	null	5.36593
AURKB	null	null	null	5.36587
SEC61B	null	null	null	5.36574
MELK	null	null	null	5.36501
ITGA4	null	null	null	5.36068
CREM	null	null	null	5.3561
C5AR1	null	null	null	5.35412
BTN3A3	null	null	null	5.35215
CAV1	null	null	null	5.3388
CD84	null	null	null	5.33805
RAB38	null	null	null	5.33651
ENY2	null	null	null	5.3346
HLA-C	null	null	null	5.32925
FCN3	null	null	null	5.32856
DENND3	null	null	null	5.32762
FBXO5	null	null	null	5.32081
HCAR3	null	null	null	5.31315
APOBEC3G	null	null	null	5.31164
ATG12	null	null	null	5.31027
CAPN12	null	null	null	5.30901
BCAT1	null	null	null	5.30485
NEDD8	null	null	null	5.30232
MIS18BP1	null	null	null	5.29601
PELI1	null	null	null	5.29178
KIF4A	null	null	null	5.29122
SREK1	null	null	null	5.28823
TRPS1	null	null	null	5.28394
ANKRD28	null	null	null	5.28133
ENKUR	null	null	null	5.28029
GMFG	null	null	null	5.27385
LAG3	null	null	null	5.27359
DCN	null	null	null	5.27298
LHFP	null	null	null	5.27253
UBASH3B	null	null	null	5.27044
GGTA1P	null	null	null	5.27008
WDR44	null	null	null	5.26918
INHBA	null	null	null	5.26632
NLRC4	null	null	null	5.26374
ASXL2	null	null	null	5.26066
MXRA5	null	null	null	5.26055
SEC22C	null	null	null	5.25963
MKI67	null	null	null	5.25751
PLVAP	null	null	null	5.25453
ZDHHC17	null	null	null	5.2512
PSAT1	null	null	null	5.25082
PFDN4	null	null	null	5.25071
CKAP2	null	null	null	5.24598
MAD2L2	null	null	null	5.24495
SLC39A6	null	null	null	5.24415
RPL22L1	null	null	null	5.24369
IFT20	null	null	null	5.243
FFAR2	null	null	null	5.24172
CDH5	null	null	null	5.24128
PLIN3	null	null	null	5.24109
ACTR2	null	null	null	5.23648
WNT4	null	null	null	5.23449
OSM	null	null	null	5.23436
SPI1	null	null	null	5.23376
KLF2	null	null	null	5.22974
SUCNR1	null	null	null	5.22948
S100A2	null	null	null	5.22938
MFAP2	null	null	null	5.2292
RASGRP3	null	null	null	5.22848
ECT2	null	null	null	5.2257
COL12A1	null	null	null	5.22337
H2AFJ	null	null	null	5.22334
IGFLR1	null	null	null	5.22076
MYO1F	null	null	null	5.22005
LIPG	null	null	null	5.21677
NBN	null	null	null	5.21442
CLASP2	null	null	null	5.2114
HMMR	null	null	null	5.20684
CLIC2	null	null	null	5.2037
TRPV2	null	null	null	5.20359
CCDC167	null	null	null	5.20029
XAF1	null	null	null	5.20027
TMEM256	null	null	null	5.19937
TGFBR2	null	null	null	5.19618
MACF1	null	null	null	5.19445
APOL3	null	null	null	5.19353
BCL2A1	null	null	null	5.19305
RAB8B	null	null	null	5.19029
FGL2	null	null	null	5.18985
MAGED2	null	null	null	5.18948
CD93	null	null	null	5.18755
DUSP4	null	null	null	5.18428
NUP50	null	null	null	5.18109
CCR10	null	null	null	5.17135
FADS2	null	null	null	5.17134
C6orf106	null	null	null	5.1705
SRPR	null	null	null	5.1683
CDCA3	null	null	null	5.16536
FAM198B	null	null	null	5.16228
ADORA3	null	null	null	5.15997
PSAP	null	null	null	5.15853
OSMR	null	null	null	5.15546
IFI27	null	null	null	5.15489
RILPL2	null	null	null	5.15165
CCL24	null	null	null	5.15014
PROK2	null	null	null	5.14961
RHOJ	null	null	null	5.14342
SELT	null	null	null	5.14341
DNASE1L3	null	null	null	5.14251
DHFR	null	null	null	5.14005
PGK1	null	null	null	5.13915
DYSF	null	null	null	5.1375
ALPK1	null	null	null	5.13521
IFI16	null	null	null	5.13333
LBP	null	null	null	5.12729
GYG1	null	null	null	5.12377
BICD1	null	null	null	5.12263
SERPING1	null	null	null	5.12144
RPS6KA2	null	null	null	5.12095
APLNR	null	null	null	5.12071
CAPN6	null	null	null	5.11535
PRIM2	null	null	null	5.11356
TRA2A	null	null	null	5.11332
EVA1B	null	null	null	5.11242
RAP2A	null	null	null	5.11068
BIK	null	null	null	5.11029
WIPF1	null	null	null	5.10506
KIAA0125	null	null	null	5.09796
CDCA2	null	null	null	5.09239
HMGB2	null	null	null	5.08866
PRR11	null	null	null	5.08688
REG4	null	null	null	5.08207
P4HB	null	null	null	5.07607
CANX	null	null	null	5.0743
APOL6	null	null	null	5.07327
SEC61G	null	null	null	5.07302
ARRB2	null	null	null	5.07056
TMEM30A	null	null	null	5.06743
SPC25	null	null	null	5.06341
CXCR6	null	null	null	5.06237
SEPN1	null	null	null	5.06066
DRAM2	null	null	null	5.06034
NUP62	null	null	null	5.05691
XRCC4	null	null	null	5.05535
IFNGR1	null	null	null	5.05433
NT5C3	null	null	null	5.05399
PRC1	null	null	null	5.0514
PIR	null	null	null	5.04944
PSME4	null	null	null	5.04521
OSTF1	null	null	null	5.0427
CEP72	null	null	null	5.0419
FDFT1	null	null	null	5.04155
CECR1	null	null	null	5.04143
SNRPC	null	null	null	5.03656
ERO1LB	null	null	null	5.03654
FOXC1	null	null	null	5.03609
SELPLG	null	null	null	5.03523
IFI44	null	null	null	5.03457
CEP170	null	null	null	5.03302
SAMD8	null	null	null	5.02659
COMMD4	null	null	null	5.02188
GRB2	null	null	null	5.02166
LEPRE1	null	null	null	5.01656
NCOA7	null	null	null	5.01626
RHOB	null	null	null	5.0147
ATOX1	null	null	null	5.01438
SERPINF1	null	null	null	5.01081
ASPM	null	null	null	5.00903
SPNS2	null	null	null	5.00708
TACSTD2	null	null	null	5.00576
LILRA6	null	null	null	5.00432
PBK	null	null	null	5.00385
SLC7A11	null	null	null	5.00263
EDEM1	null	null	null	4.99956
HLA-DPB1	null	null	null	4.99894
ANKRD37	null	null	null	4.9989
TK1	null	null	null	4.99736
PALLD	null	null	null	4.99441
APOL4	null	null	null	4.98625
BCL2L1	null	null	null	4.98136
PAPD4	null	null	null	4.98111
RDH11	null	null	null	4.98045
PTK2B	null	null	null	4.97497
ESAM	null	null	null	4.97435
ARL1	null	null	null	4.97286
LMAN1	null	null	null	4.97136
CENPA	null	null	null	4.97084
RTP4	null	null	null	4.9663
RARB	null	null	null	4.96521
PART1	null	null	null	4.96478
IL1RN	null	null	null	4.96455
S100A12	null	null	null	4.96443
INPP4A	null	null	null	4.95765
PPT1	null	null	null	4.9574
RAMP3	null	null	null	4.9574
PLEKHO2	null	null	null	4.95108
CXorf38	null	null	null	4.94959
RUNX2	null	null	null	4.94755
RNF141	null	null	null	4.94601
RACGAP1	null	null	null	4.93996
LMAN2	null	null	null	4.93585
YWHAE	null	null	null	4.93315
HTRA1	null	null	null	4.9292
LDB2	null	null	null	4.92588
FUT8-AS1	null	null	null	4.92408
FAIM	null	null	null	4.92322
TREM1	null	null	null	4.92285
VPS35	null	null	null	4.91421
GAB3	null	null	null	4.91182
PDCD1LG2	null	null	null	4.90901
MSANTD3	null	null	null	4.90865
ICAM1	null	null	null	4.90775
GPCPD1	null	null	null	4.90628
IFNAR2	null	null	null	4.90533
PNOC	null	null	null	4.90385
ATP6V0E1	null	null	null	4.89651
CARD8	null	null	null	4.89611
DNAJB11	null	null	null	4.89482
AQP9	null	null	null	4.89283
NRG1	null	null	null	4.89117
KIF11	null	null	null	4.88241
LPGAT1	null	null	null	4.87891
CCNB2	null	null	null	4.87875
PIP5K1A	null	null	null	4.87315
LEPROT	null	null	null	4.87244
SLCO3A1	null	null	null	4.86963
TMED10	null	null	null	4.8689
CPA3	null	null	null	4.86803
CWF19L1	null	null	null	4.86489
DDOST	null	null	null	4.86482
TSEN15	null	null	null	4.86447
ROBO1	null	null	null	4.86089
EIF5	null	null	null	4.86082
BCL9L	null	null	null	4.85728
RAN	null	null	null	4.85691
TIMP3	null	null	null	4.85577
SGOL2	null	null	null	4.85273
C11orf58	null	null	null	4.85231
PCDH18	null	null	null	4.85227
GNG11	null	null	null	4.84269
BTF3L4	null	null	null	4.84087
COL7A1	null	null	null	4.83855
RPN1	null	null	null	4.83772
SH3BP2	null	null	null	4.83679
MMRN2	null	null	null	4.83664
IFI6	null	null	null	4.83451
S100PBP	null	null	null	4.83109
SPG21	null	null	null	4.82934
KIAA1199	null	null	null	4.82843
CYTH4	null	null	null	4.82362
GTF2E2	null	null	null	4.82212
CFP	null	null	null	4.82151
MDFIC	null	null	null	4.8176
HLA-B	null	null	null	4.81615
TRMT112	null	null	null	4.8157
LOC100506119	null	null	null	4.81178
DKK3	null	null	null	4.80726
EVI2A	null	null	null	4.80663
TBXAS1	null	null	null	4.80453
LAPTM5	null	null	null	4.80433
LOX	null	null	null	4.80406
CDS2	null	null	null	4.8032
SNAI2	null	null	null	4.80267
FAM65C	null	null	null	4.8022
NCKAP1L	null	null	null	4.80206
ANGPTL2	null	null	null	4.80136
MRP63	null	null	null	4.80087
ANGPT2	null	null	null	4.79958
ATXN1	null	null	null	4.79851
EXOC5	null	null	null	4.79551
UCP2	null	null	null	4.79296
FAM49B	null	null	null	4.79245
RAC2	null	null	null	4.79161
LINC00342	null	null	null	4.79145
ATP6V1G1	null	null	null	4.79119
BACE1	null	null	null	4.78971
LOC643733	null	null	null	4.78964
FLT1	null	null	null	4.78771
LOC728093	null	null	null	4.78687
ATAD2	null	null	null	4.78652
GOLGA2	null	null	null	4.78339
TPGS2	null	null	null	4.78324
COL15A1	null	null	null	4.78259
SDC3	null	null	null	4.78057
CUL7	null	null	null	4.7794
ADIPOR1	null	null	null	4.77829
S100P	null	null	null	4.77734
TROAP	null	null	null	4.77664
ALDH4A1	null	null	null	4.7755
VTI1A	null	null	null	4.77434
C11orf80	null	null	null	4.77411
ROCK1	null	null	null	4.77277
ODF2L	null	null	null	4.77204
SLA	null	null	null	4.76416
NUS1	null	null	null	4.7638
HCST	null	null	null	4.7638
NUDT1	null	null	null	4.76341
HKDC1	null	null	null	4.76333
TRERF1	null	null	null	4.76288
UFL1	null	null	null	4.76002
SEC31A	null	null	null	4.76
SEC63	null	null	null	4.75627
HPS5	null	null	null	4.75609
ZG16B	null	null	null	4.75483
MZT2B	null	null	null	4.74752
SLC15A2	null	null	null	4.74619
TMEM19	null	null	null	4.74449
CDC42SE2	null	null	null	4.74169
DDX17	null	null	null	4.74145
BTN3A1	null	null	null	4.73699
SAP30	null	null	null	4.73694
B2M	null	null	null	4.73658
PREX1	null	null	null	4.7352
PSMA7	null	null	null	4.73441
CDC20	null	null	null	4.73426
PHF21A	null	null	null	4.73376
ZNF654	null	null	null	4.73328
LUM	null	null	null	4.7294
TMEM173	null	null	null	4.72923
CMTM2	null	null	null	4.72576
C19orf66	null	null	null	4.72485
ABLIM3	null	null	null	4.72242
GNA15	null	null	null	4.72017
RPL36AL	null	null	null	4.71621
ABCB6	null	null	null	4.71529
MTDH	null	null	null	4.70728
CCDC88C	null	null	null	4.7028
DEDD	null	null	null	4.70113
PSMB5	null	null	null	4.69277
APC	null	null	null	4.69266
LAMA4	null	null	null	4.69233
TANK	null	null	null	4.68903
COPB1	null	null	null	4.68869
CYB5R4	null	null	null	4.68841
GALK2	null	null	null	4.68828
TNC	null	null	null	4.68745
RHOA	null	null	null	4.68696
LAP3	null	null	null	4.68133
KDELR1	null	null	null	4.67862
TAPBP	null	null	null	4.67832
TCF4	null	null	null	4.67723
HPSE	null	null	null	4.67694
SNTB2	null	null	null	4.67474
OS9	null	null	null	4.67139
CSTA	null	null	null	4.66883
RHOF	null	null	null	4.66691
CHAC1	null	null	null	4.66176
SGMS1	null	null	null	4.66116
FER1L4	null	null	null	4.66047
LINC00094	null	null	null	4.65456
COTL1	null	null	null	4.65416
GALNT18	null	null	null	4.65354
PXDC1	null	null	null	4.65094
LHX6	null	null	null	4.65014
2013-09-02	null	null	null	4.64804
SLC31A2	null	null	null	4.64763
ISG15	null	null	null	4.64752
ALOX5AP	null	null	null	4.64585
PARPBP	null	null	null	4.64525
PRKAR2B	null	null	null	4.64459
AASDH	null	null	null	4.64361
RPL26L1	null	null	null	4.63476
CENPI	null	null	null	4.63306
UBE2T	null	null	null	4.63306
MYO1C	null	null	null	4.63232
CHST12	null	null	null	4.63072
TWSG1	null	null	null	4.62191
TESC	null	null	null	4.62175
LINC00173	null	null	null	4.6179
LRRC8C	null	null	null	4.61679
SLFN5	null	null	null	4.60958
PAPSS1	null	null	null	4.59933
STAT4	null	null	null	4.59824
HLA-F	null	null	null	4.5972
S100A11	null	null	null	4.59625
ITGB1	null	null	null	4.59492
TDO2	null	null	null	4.59333
SLC16A3	null	null	null	4.59139
REG1P	null	null	null	4.59133
LSM12	null	null	null	4.5911
KIF3A	null	null	null	4.58858
SBNO2	null	null	null	4.58321
GABRP	null	null	null	4.57966
TGFB1	null	null	null	4.57754
PPP2R3C	null	null	null	4.57318
GLB1	null	null	null	4.57311
GJA4	null	null	null	4.57232
RRM1	null	null	null	4.57223
FCN1	null	null	null	4.57217
DARS	null	null	null	4.57021
GMPPA	null	null	null	4.56984
FDPS	null	null	null	4.56859
DEPDC1	null	null	null	4.56728
TLR2	null	null	null	4.5658
RND1	null	null	null	4.56466
AFF1	null	null	null	4.56101
C12orf39	null	null	null	4.56017
GNB4	null	null	null	4.55974
MAPK12	null	null	null	4.55962
MDM2	null	null	null	4.5596
TMEM50B	null	null	null	4.55838
VSIG4	null	null	null	4.55792
FRY	null	null	null	4.55791
YKT6	null	null	null	4.55598
SHCBP1	null	null	null	4.55437
CBX4	null	null	null	4.54713
DPY30	null	null	null	4.5466
MED6	null	null	null	4.54412
HLA-DOA	null	null	null	4.54169
FBXW7	null	null	null	4.54096
TMEM208	null	null	null	4.54008
ADPRH	null	null	null	4.53886
CD163L1	null	null	null	4.53746
GALC	null	null	null	4.53454
ARHGDIB	null	null	null	4.53423
PMAIP1	null	null	null	4.53072
TPRG1	null	null	null	4.5293
PLOD1	null	null	null	4.52611
EFCAB11	null	null	null	4.52583
BRAF	null	null	null	4.52535
HCLS1	null	null	null	4.52295
GLDC	null	null	null	4.52023
CTLA4	null	null	null	4.51941
ELK3	null	null	null	4.51874
TXNDC11	null	null	null	4.5186
FKBP8	null	null	null	4.51494
TCIRG1	null	null	null	4.51428
SDC1	null	null	null	4.51313
MEOX1	null	null	null	4.51236
SOCS3	null	null	null	4.5107
TSPEAR	null	null	null	4.50952
ACLY	null	null	null	4.50635
AAED1	null	null	null	4.50595
BBX	null	null	null	4.50452
ABI2	null	null	null	4.50441
BTN3A2	null	null	null	4.50236
MRPS21	null	null	null	4.50092
IL10RA	null	null	null	4.49989
ARID4B	null	null	null	4.49893
MGAT1	null	null	null	4.49593
DENND5B	null	null	null	4.49546
ADAMTS12	null	null	null	4.49506
WAC	null	null	null	4.49191
NRBF2	null	null	null	4.49125
LY6E	null	null	null	4.48624
MRPL54	null	null	null	4.48599
ETS2	null	null	null	4.4853
FLJ32255	null	null	null	4.48422
WAS	null	null	null	4.48414
TSTA3	null	null	null	4.48335
KMO	null	null	null	4.48254
OXCT1	null	null	null	4.47894
CARD6	null	null	null	4.47871
HFE	null	null	null	4.47763
SEMA4D	null	null	null	4.47629
RSF1	null	null	null	4.47295
FOLR2	null	null	null	4.47148
CKAP2L	null	null	null	4.47116
POSTN	null	null	null	4.46621
BUB1B	null	null	null	4.46619
DDX58	null	null	null	4.46557
APOE	null	null	null	4.46102
IRF9	null	null	null	4.46098
CYTIP	null	null	null	4.46066
EXOC4	null	null	null	4.45512
SPG11	null	null	null	4.45511
MIB1	null	null	null	4.45482
EFEMP2	null	null	null	4.45179
ETV7	null	null	null	4.44908
ARL4C	null	null	null	4.44876
IL3RA	null	null	null	4.44788
LOC100506374	null	null	null	4.44682
AURKA	null	null	null	4.4467
ATP2C1	null	null	null	4.446
PLA2G16	null	null	null	4.44513
SASH1	null	null	null	4.44466
WSB1	null	null	null	4.44439
STS	null	null	null	4.43757
PLK1	null	null	null	4.43739
DDIT4	null	null	null	4.43364
SHMT2	null	null	null	4.43346
SS18	null	null	null	4.43284
BRCA2	null	null	null	4.43239
CLC	null	null	null	4.43003
MGC24103	null	null	null	4.42974
MZT1	null	null	null	4.42968
PIK3CG	null	null	null	4.4282
CKS2	null	null	null	4.42692
MITF	null	null	null	4.42521
MRC2	null	null	null	4.42327
MR1	null	null	null	4.42279
WDR36	null	null	null	4.42251
DOK3	null	null	null	4.42118
TTC7B	null	null	null	4.42067
TRAFD1	null	null	null	4.42003
COL18A1	null	null	null	4.4192
SARNP	null	null	null	4.41666
LIN52	null	null	null	4.41438
NPL	null	null	null	4.41151
CIITA	null	null	null	4.41143
PDCL	null	null	null	4.41134
RASSF1	null	null	null	4.41027
KNSTRN	null	null	null	4.40943
AMZ2P1	null	null	null	4.4092
EPRS	null	null	null	4.40427
MAP3K8	null	null	null	4.40323
GOLGA4	null	null	null	4.4031
VEGFA	null	null	null	4.40227
BAAT	null	null	null	4.40135
TMEM241	null	null	null	4.39933
AFF4	null	null	null	4.39881
RBFOX2	null	null	null	4.39812
TAX1BP1	null	null	null	4.39564
PITPNC1	null	null	null	4.39206
MPV17	null	null	null	4.39146
KLHL6	null	null	null	4.38963
FANCM	null	null	null	4.38938
UBE2S	null	null	null	4.38249
MCAM	null	null	null	4.38051
SLC6A13	null	null	null	4.37739
FPR2	null	null	null	4.37526
COL6A2	null	null	null	4.37211
IGJ	null	null	null	4.37169
APOBEC3C	null	null	null	4.3686
EHD2	null	null	null	4.36754
NDUFA7	null	null	null	4.36596
DEF8	null	null	null	4.36547
CLMP	null	null	null	4.36487
GABPB1	null	null	null	4.36389
FKBP10	null	null	null	4.36383
OAS3	null	null	null	4.36369
ART3	null	null	null	4.36248
BRSK1	null	null	null	4.36227
SYTL1	null	null	null	4.3594
ANAPC11	null	null	null	4.35821
ZCRB1	null	null	null	4.3567
LDLRAD3	null	null	null	4.35547
IL6ST	null	null	null	4.35306
TK2	null	null	null	4.3524
RAD21	null	null	null	4.35238
SLC1A4	null	null	null	4.35209
DSE	null	null	null	4.35002
UBE2D3	null	null	null	4.34743
PSMB3	null	null	null	4.34511
BTN2A2	null	null	null	4.34482
SERPINE1	null	null	null	4.34451
SRBD1	null	null	null	4.34406
GPR65	null	null	null	4.34364
SSR2	null	null	null	4.34201
WDR54	null	null	null	4.33959
SH3PXD2B	null	null	null	4.33628
ECSCR	null	null	null	4.33622
IGFBP2	null	null	null	4.33523
LMO4	null	null	null	4.33149
DLGAP4	null	null	null	4.33126
TTC9	null	null	null	4.32967
SEC13	null	null	null	4.32378
DEFB124	null	null	null	4.32309
FGR	null	null	null	4.32034
HLA-G	null	null	null	4.31527
FIBIN	null	null	null	4.31508
FAM63B	null	null	null	4.31254
KLHL29	null	null	null	4.31181
HAX1	null	null	null	4.30885
SGCE	null	null	null	4.30881
SLC38A2	null	null	null	4.30737
ATP10D	null	null	null	4.30596
LILRA3	null	null	null	4.30578
NAGK	null	null	null	4.30453
SP110	null	null	null	4.3027
KIRREL	null	null	null	4.3025
TALDO1	null	null	null	4.30228
S100A4	null	null	null	4.3007
SLC38A5	null	null	null	4.30024
MICB	null	null	null	4.29693
HIP1	null	null	null	4.29661
ASAH1	null	null	null	4.29609
USP2	null	null	null	4.29563
FSCN1	null	null	null	4.29413
TMEM50A	null	null	null	4.29305
MB21D1	null	null	null	4.29295
PAPPA	null	null	null	4.29133
CD33	null	null	null	4.28914
RNF183	null	null	null	4.28785
CCNI	null	null	null	4.28752
BASP1	null	null	null	4.28712
LPP	null	null	null	4.2856
YIF1A	null	null	null	4.28412
C14orf64	null	null	null	4.28389
SH3BGRL	null	null	null	4.28182
HIST1H2BC	null	null	null	4.27627
CASP8	null	null	null	4.27455
TIMP2	null	null	null	4.27357
PSMB6	null	null	null	4.27255
SWAP70	null	null	null	4.27069
AGRN	null	null	null	4.27053
SNED1	null	null	null	4.26947
CXCL5	null	null	null	4.2689
PLXNA1	null	null	null	4.2683
ENPP2	null	null	null	4.26456
NQO1	null	null	null	4.2644
KBTBD2	null	null	null	4.26357
SIL1	null	null	null	4.26087
C9orf16	null	null	null	4.25906
F2RL2	null	null	null	4.25633
COA1	null	null	null	4.25563
ANXA4	null	null	null	4.25481
MMP19	null	null	null	4.25404
CPSF2	null	null	null	4.25365
DBNL	null	null	null	4.25258
CEACAM6	null	null	null	4.25221
LAMB1	null	null	null	4.24941
KIAA1551	null	null	null	4.24939
GLS	null	null	null	4.24841
MPHOSPH9	null	null	null	4.24575
PFKFB3	null	null	null	4.24403
AMOTL1	null	null	null	4.24166
PCNX	null	null	null	4.24116
FAM126A	null	null	null	4.23967
ATP6V1C1	null	null	null	4.23947
PTRH1	null	null	null	4.23913
FMNL1	null	null	null	4.23809
CLEC4E	null	null	null	4.23676
IFNG	null	null	null	4.23591
OLFM4	null	null	null	4.2352
PEX2	null	null	null	4.23499
TPX2	null	null	null	4.23481
C5orf15	null	null	null	4.23259
PAIP2	null	null	null	4.23213
ZBED2	null	null	null	4.22779
VSIG1	null	null	null	4.22529
SLC16A14	null	null	null	4.22456
GPX7	null	null	null	4.22425
NUDT21	null	null	null	4.22388
TMOD3	null	null	null	4.22378
ETS1	null	null	null	4.22317
LOC100131043	null	null	null	4.22299
GANAB	null	null	null	4.2187
UBA1	null	null	null	4.2163
EPSTI1	null	null	null	4.21479
ENO1	null	null	null	4.21389
JKAMP	null	null	null	4.21386
TGFBR1	null	null	null	4.21341
ACO1	null	null	null	4.21298
SEPHS1	null	null	null	4.21215
AGPAT4	null	null	null	4.21109
LGALS8	null	null	null	4.20802
ANGPTL4	null	null	null	4.20759
SLC2A3	null	null	null	4.20699
MADCAM1	null	null	null	4.20639
HGF	null	null	null	4.20557
MOXD1	null	null	null	4.20526
HIST1H1C	null	null	null	4.20425
STX2	null	null	null	4.20297
PIF1	null	null	null	4.20279
HELZ2	null	null	null	4.20237
FAP	null	null	null	4.20195
ST3GAL5	null	null	null	4.20066
KIAA0930	null	null	null	4.20055
PSMD1	null	null	null	4.19812
HOMER1	null	null	null	4.1973
RRAGD	null	null	null	4.19723
PTMA	null	null	null	4.1966
LIMD1	null	null	null	4.19605
DPCD	null	null	null	4.19572
RCAN3	null	null	null	4.19173
SESTD1	null	null	null	4.19159
DPEP2	null	null	null	4.18983
FANCI	null	null	null	4.18921
TM9SF1	null	null	null	4.18915
YIF1B	null	null	null	4.1878
DCTN6	null	null	null	4.18757
MXD1	null	null	null	4.18715
PTPRM	null	null	null	4.18275
SNRNP27	null	null	null	4.1825
PTPN13	null	null	null	4.18098
SCAMP1	null	null	null	4.18024
SPINK1	null	null	null	4.18013
MMP9	null	null	null	4.17915
CCDC91	null	null	null	4.17079
C5orf56	null	null	null	4.17052
BTK	null	null	null	4.17013
KIAA0146	null	null	null	4.1685
ACTB	null	null	null	4.16287
ARHGEF15	null	null	null	4.16262
FLI1	null	null	null	4.16236
CDKN2C	null	null	null	4.16229
PLA1A	null	null	null	4.16118
PQLC3	null	null	null	4.16075
MRAP2	null	null	null	4.16028
RPA3	null	null	null	4.15783
AGA	null	null	null	4.15672
PRUNE2	null	null	null	4.15506
ACBD5	null	null	null	4.15366
ACSL1	null	null	null	4.15338
MEX3C	null	null	null	4.15283
FAM214B	null	null	null	4.14912
RHOBTB1	null	null	null	4.14877
SRC	null	null	null	4.14856
RNASEH2A	null	null	null	4.14846
BATF2	null	null	null	4.14797
EMR3	null	null	null	4.14722
LINC00582	null	null	null	4.1461
TAGAP	null	null	null	4.14605
SLC22A12	null	null	null	4.14585
EML4	null	null	null	4.14555
KCNE4	null	null	null	4.14451
TKT	null	null	null	4.14386
ADAMTS9	null	null	null	4.14362
KIAA1644	null	null	null	4.14334
SLFN12	null	null	null	4.14316
APOBEC3F	null	null	null	4.14285
GLT8D1	null	null	null	4.14151
PTPN11	null	null	null	4.14048
DUSP5	null	null	null	4.1404
CTSH	null	null	null	4.13689
CENPE	null	null	null	4.13682
BBC3	null	null	null	4.13497
MAF	null	null	null	4.13357
MPG	null	null	null	4.12749
FLJ35700	null	null	null	4.12256
LOC100506206	null	null	null	4.12235
UFD1L	null	null	null	4.12109
M6PR	null	null	null	4.11937
RIF1	null	null	null	4.11851
PHKA1	null	null	null	4.11597
SNAP23	null	null	null	4.11511
EMILIN1	null	null	null	4.11424
DHTKD1	null	null	null	4.11403
P4HA1	null	null	null	4.11255
CD80	null	null	null	4.1112
EGFL6	null	null	null	4.11003
SCFD1	null	null	null	4.10713
SRSF4	null	null	null	4.10637
AP3B1	null	null	null	4.10521
PTPRC	null	null	null	4.1052
SIVA1	null	null	null	4.10432
RBMS1	null	null	null	4.10346
MTIF3	null	null	null	4.10259
TNKS2	null	null	null	4.10156
LOC401397	null	null	null	4.10037
FMNL2	null	null	null	4.09775
ZEB2	null	null	null	4.09538
ATP11C	null	null	null	4.09537
TAP2	null	null	null	4.09162
BNIP2	null	null	null	4.09138
MMD	null	null	null	4.09023
CEP112	null	null	null	4.08908
CETN2	null	null	null	4.08741
CXXC4	null	null	null	4.08254
KIT	null	null	null	4.08204
GIMAP8	null	null	null	4.08099
AHCYL1	null	null	null	4.08041
SLAMF1	null	null	null	4.08016
TOMM5	null	null	null	4.07943
CALHM2	null	null	null	4.07898
IL17A	null	null	null	4.07711
KIAA0101	null	null	null	4.07477
AGGF1	null	null	null	4.07345
ARL2BP	null	null	null	4.07265
LPL	null	null	null	4.07214
AASS	null	null	null	4.06849
REXO2	null	null	null	4.06758
IL13RA1	null	null	null	4.06576
GNS	null	null	null	4.06554
NF1	null	null	null	4.06497
LAMP5	null	null	null	4.06263
KDM5B-AS1	null	null	null	4.06126
FXR1	null	null	null	4.06065
GPR82	null	null	null	4.05925
PIM3	null	null	null	4.05909
TAF12	null	null	null	4.05822
FBXL2	null	null	null	4.05821
CHD9	null	null	null	4.05816
ARFGAP3	null	null	null	4.05676
P2RY6	null	null	null	4.05596
GIMAP2	null	null	null	4.05579
ACTR8	null	null	null	4.05501
ZSCAN12P1	null	null	null	4.05261
TNRC6A	null	null	null	4.05255
LBH	null	null	null	4.05086
PTP4A3	null	null	null	4.05076
PLTP	null	null	null	4.04782
SERPINA3	null	null	null	4.0457
MACC1	null	null	null	4.04566
CTSL1P8	null	null	null	4.0449
ELOVL5	null	null	null	4.04362
DNAJC3	null	null	null	4.04282
DOK2	null	null	null	4.04254
SCAF11	null	null	null	4.04116
CYLD	null	null	null	4.03963
CLCN4	null	null	null	4.03871
SLC7A14	null	null	null	4.03787
ASH1L	null	null	null	4.0356
ATRX	null	null	null	4.0319
APOPT1	null	null	null	4.03099
COPZ1	null	null	null	4.0306
MRAS	null	null	null	4.02935
HDLBP	null	null	null	4.02814
RGS16	null	null	null	4.02442
NPTX2	null	null	null	4.02412
CDC34	null	null	null	4.02059
WFS1	null	null	null	4.01864
SDC2	null	null	null	4.01761
CEP19	null	null	null	4.01626
PTGS2	null	null	null	4.01546
RAB5A	null	null	null	4.01509
KIAA0754	null	null	null	4.01373
ARID3A	null	null	null	4.01319
GK3P	null	null	null	4.01299
SRP72	null	null	null	4.01179
FAM114A1	null	null	null	4.01139
CDKN2A	null	null	null	4.01086
LOC100131015	null	null	null	4.01026
GTF2I	null	null	null	4.00834
S100A6	null	null	null	4.00699
GPATCH2L	null	null	null	4.00598
RAMP2	null	null	null	4.0049
ALPL	null	null	null	4.00457
NPEPPS	null	null	null	4.00412
POC1A	null	null	null	4.00277
UTRN	null	null	null	4.00091
TRIM59	null	null	null	4.00078
GPR97	null	null	null	4.00076
DUOXA1	null	null	null	3.9989
KLK12	null	null	null	3.99879
FAM83D	null	null	null	3.99651
TPP1	null	null	null	3.9965
GPSM3	null	null	null	3.99612
SRGAP2	null	null	null	3.99591
C1RL	null	null	null	3.99407
DOCK8	null	null	null	3.9939
KIF23	null	null	null	3.99123
MERTK	null	null	null	3.99044
OGT	null	null	null	3.98808
CHN1	null	null	null	3.98704
OTUB2	null	null	null	3.98527
IL1R1	null	null	null	3.98504
UGCG	null	null	null	3.98469
TNFRSF1B	null	null	null	3.98428
NCK1	null	null	null	3.98406
GPR176	null	null	null	3.98367
G2E3	null	null	null	3.9827
CMTM3	null	null	null	3.981
TMEM167A	null	null	null	3.98067
NINJ1	null	null	null	3.97962
FKBP3	null	null	null	3.97915
MRPL33	null	null	null	3.97913
LRRC17	null	null	null	3.9786
RHD	null	null	null	3.97768
2013-09-06	null	null	null	3.97268
MOB1A	null	null	null	3.97133
ITGAX	null	null	null	3.97056
IGF1	null	null	null	3.96976
RAB30	null	null	null	3.96972
AMZ2	null	null	null	3.96847
ANO1	null	null	null	3.96731
FRMD4A	null	null	null	3.96677
YPEL2	null	null	null	3.96626
FBXO33	null	null	null	3.96283
MKLN1	null	null	null	3.95988
CD27	null	null	null	3.95832
APOBEC1	null	null	null	3.95665
UBA5	null	null	null	3.95643
AMMECR1	null	null	null	3.95567
GCLM	null	null	null	3.9547
C2CD4A	null	null	null	3.95467
ESCO2	null	null	null	3.95361
SLC23A2	null	null	null	3.95329
TRIM2	null	null	null	3.9531
FDXACB1	null	null	null	3.95093
NDUFV2	null	null	null	3.95052
CD276	null	null	null	3.94677
DAPK1	null	null	null	3.94669
FBXW11	null	null	null	3.94591
PDLIM7	null	null	null	3.94014
TES	null	null	null	3.93983
RAPGEF2	null	null	null	3.93982
TLX1	null	null	null	3.93945
LYST	null	null	null	3.93936
PDE1C	null	null	null	3.93818
CKAP5	null	null	null	3.93759
ASCC3	null	null	null	3.9348
CCL28	null	null	null	3.9324
CREB1	null	null	null	3.92979
N4BP2L1	null	null	null	3.92649
EXOC2	null	null	null	3.92581
FBXO4	null	null	null	3.92483
TNFSF13B	null	null	null	3.92475
CCL18	null	null	null	3.92466
PHF17	null	null	null	3.92191
TTC38	null	null	null	3.92078
HMGN1	null	null	null	3.92053
TMTC1	null	null	null	3.92019
FERMT2	null	null	null	3.91989
CELF2	null	null	null	3.91976
POLR2K	null	null	null	3.91943
VOPP1	null	null	null	3.91911
ERRFI1	null	null	null	3.91626
STRA6	null	null	null	3.91559
PMEPA1	null	null	null	3.91466
SEMA4A	null	null	null	3.91323
POU6F1	null	null	null	3.91194
RHEB	null	null	null	3.91184
GIMAP7	null	null	null	3.91121
ERGIC2	null	null	null	3.91071
SCAMP5	null	null	null	3.90764
ACOT9	null	null	null	3.90743
FAM76B	null	null	null	3.90706
ARPC3	null	null	null	3.90605
PPFIBP1	null	null	null	3.9047
GPR110	null	null	null	3.90444
FKBP2	null	null	null	3.90322
MLLT10	null	null	null	3.90303
TYMS	null	null	null	3.90294
SLCO4A1	null	null	null	3.90219
CDH3	null	null	null	3.90182
VASH1	null	null	null	3.90038
RTN1	null	null	null	3.8999
RASEF	null	null	null	3.89984
CYGB	null	null	null	3.89919
KIAA0513	null	null	null	3.89808
PKIA	null	null	null	3.89806
CSNK1G1	null	null	null	3.89453
UBXN4	null	null	null	3.89224
LINC00152	null	null	null	3.8895
TNFAIP8	null	null	null	3.88777
ANAPC5	null	null	null	3.88494
ELK4	null	null	null	3.88236
FAM195B	null	null	null	3.88207
SH2B2	null	null	null	3.88205
TSPAN4	null	null	null	3.88077
CDKN1C	null	null	null	3.8804
C10orf128	null	null	null	3.88035
UBR2	null	null	null	3.87941
ARID1A	null	null	null	3.87661
SLCO2B1	null	null	null	3.87647
SYNGR2	null	null	null	3.87582
MESDC2	null	null	null	3.87322
GUCY1B3	null	null	null	3.87055
ALOX15B	null	null	null	3.86925
GDI2	null	null	null	3.8691
DSTN	null	null	null	3.86879
LOXL1	null	null	null	3.86868
PSMD8	null	null	null	3.86865
WASF2	null	null	null	3.86308
CCL7	null	null	null	3.86215
PLEKHA2	null	null	null	3.8615
MAGOH	null	null	null	3.86087
GSX2	null	null	null	3.85745
ARSG	null	null	null	3.85676
MAN1A2	null	null	null	3.85373
RFX5	null	null	null	3.84539
CSF1	null	null	null	3.84331
DDX3X	null	null	null	3.84251
KPNA2	null	null	null	3.84092
ITPR2	null	null	null	3.83953
ALOX5	null	null	null	3.83893
PRKCDBP	null	null	null	3.83889
TFG	null	null	null	3.8386
PDGFRB	null	null	null	3.83678
SERPINB5	null	null	null	3.83454
SFXN3	null	null	null	3.83356
MFGE8	null	null	null	3.83331
FLI1-AS1	null	null	null	3.82989
CPNE5	null	null	null	3.82969
CCM2L	null	null	null	3.82842
DOCK2	null	null	null	3.82723
GPD2	null	null	null	3.82689
SMARCA1	null	null	null	3.82597
WWOX	null	null	null	3.82483
RASSF5	null	null	null	3.82449
PSMB7	null	null	null	3.8226
DTD1	null	null	null	3.8176
PLEKHO1	null	null	null	3.81606
CEP135	null	null	null	3.81492
MMADHC	null	null	null	3.8129
PBRM1	null	null	null	3.81185
ARHGAP25	null	null	null	3.81025
ALDH7A1	null	null	null	3.80954
TMEM242	null	null	null	3.80908
CISD2	null	null	null	3.80726
QSOX1	null	null	null	3.80707
CCDC88A	null	null	null	3.80635
CNOT2	null	null	null	3.80627
KCNJ8	null	null	null	3.80617
SRCAP	null	null	null	3.80393
COG5	null	null	null	3.8037
SCG5	null	null	null	3.80106
SMOX	null	null	null	3.80102
APBA2	null	null	null	3.79975
LINC00312	null	null	null	3.79971
AP2B1	null	null	null	3.79953
SLC38A7	null	null	null	3.79862
CHEK1	null	null	null	3.79794
PCSK1	null	null	null	3.79686
TRIM29	null	null	null	3.79512
ALKBH5	null	null	null	3.79356
2013-09-04	null	null	null	3.79286
GPRC5B	null	null	null	3.79274
EXOSC1	null	null	null	3.79177
GOSR2	null	null	null	3.79048
HSD17B14	null	null	null	3.78791
ITGA5	null	null	null	3.78783
SYK	null	null	null	3.78736
ATP8B2	null	null	null	3.78676
COPA	null	null	null	3.78507
MSX2	null	null	null	3.78455
AP3S1	null	null	null	3.78284
SRP19	null	null	null	3.78181
CD79A	null	null	null	3.77979
PRCP	null	null	null	3.77912
SP100	null	null	null	3.77761
TTK	null	null	null	3.77653
DYNLT1	null	null	null	3.77584
MAFG	null	null	null	3.77504
IL15RA	null	null	null	3.77411
UFM1	null	null	null	3.77139
LOC100505812	null	null	null	3.77007
EMILIN2	null	null	null	3.76896
POU2F2	null	null	null	3.7676
2013-03-01	null	null	null	3.76353
PIK3C2A	null	null	null	3.76312
UBE2H	null	null	null	3.76145
ATL3	null	null	null	3.75942
A2M	null	null	null	3.75941
ATF7IP	null	null	null	3.75856
FARP1	null	null	null	3.75268
RNF13	null	null	null	3.75038
ZDHHC20	null	null	null	3.74688
RCAN1	null	null	null	3.74638
SNRPD2	null	null	null	3.74064
CACNG8	null	null	null	3.73891
TBC1D2B	null	null	null	3.73676
CLEC5A	null	null	null	3.73653
LCP1	null	null	null	3.73479
GPR137B	null	null	null	3.73375
KLRD1	null	null	null	3.73315
CBL	null	null	null	3.73108
CYTH2	null	null	null	3.73045
RNF149	null	null	null	3.72833
IQSEC1	null	null	null	3.72751
NUP160	null	null	null	3.72329
EMCN	null	null	null	3.72063
EGLN3	null	null	null	3.71991
CRIP2	null	null	null	3.7191
ELMO2	null	null	null	3.718
SNRK	null	null	null	3.7177
B3GNT9	null	null	null	3.717
CCDC53	null	null	null	3.71692
HSPA6	null	null	null	3.7165
TTC37	null	null	null	3.71373
LOC339807	null	null	null	3.71284
CASC5	null	null	null	3.7114
COPB2	null	null	null	3.71054
PARP1	null	null	null	3.70794
KANSL1L	null	null	null	3.70758
CORO1C	null	null	null	3.70736
FAM219A	null	null	null	3.70656
RTN2	null	null	null	3.70603
ZNF24	null	null	null	3.7059
C19orf59	null	null	null	3.70516
LEPR	null	null	null	3.70106
MEF2D	null	null	null	3.69977
ERVW-1	null	null	null	3.69846
ALDH1L2	null	null	null	3.69769
NFIB	null	null	null	3.69757
NQO2	null	null	null	3.69576
RCN3	null	null	null	3.69555
NIN	null	null	null	3.69449
PTPN22	null	null	null	3.69373
CXorf36	null	null	null	3.69266
MYEOV	null	null	null	3.69163
MDK	null	null	null	3.69104
WDR66	null	null	null	3.69101
SLC4A11	null	null	null	3.68902
PLEKHF1	null	null	null	3.68687
STRIP2	null	null	null	3.68598
CMIP	null	null	null	3.68439
ANK1	null	null	null	3.68362
DBI	null	null	null	3.68165
XPNPEP3	null	null	null	3.68159
HDAC8	null	null	null	3.68116
GJD3	null	null	null	3.68099
MAP2K7	null	null	null	3.67929
TXNRD1	null	null	null	3.67904
DENND5A	null	null	null	3.6785
ARSK	null	null	null	3.67808
TPSAB1	null	null	null	3.67758
CPD	null	null	null	3.67746
ARMCX2	null	null	null	3.67615
UBE4B	null	null	null	3.67482
NAB2	null	null	null	3.67406
TCTN1	null	null	null	3.67297
DSTNP2	null	null	null	3.67236
PLEKHA3	null	null	null	3.67111
TBCEL	null	null	null	3.66953
QPCT	null	null	null	3.66813
UBFD1	null	null	null	3.66726
MIAT	null	null	null	3.66723
EIF2AK3	null	null	null	3.6668
ANTXR1	null	null	null	3.66639
ALCAM	null	null	null	3.66619
ZNF275	null	null	null	3.66465
AIDA	null	null	null	3.66348
CBX2	null	null	null	3.66181
SLC35E1	null	null	null	3.66119
NOP10	null	null	null	3.66088
CDA	null	null	null	3.65721
PPP1R18	null	null	null	3.65715
CSGALNACT2	null	null	null	3.65646
LILRB4	null	null	null	3.65557
LACC1	null	null	null	3.65339
ZCCHC6	null	null	null	3.65285
VNN3	null	null	null	3.65208
THAP6	null	null	null	3.65168
RWDD2A	null	null	null	3.65077
PICALM	null	null	null	3.65048
PIEZO1	null	null	null	3.64593
KLHL24	null	null	null	3.64447
TMEM204	null	null	null	3.64244
CACNG6	null	null	null	3.64131
LOC100996866	null	null	null	3.64064
BBS4	null	null	null	3.64047
VEGFC	null	null	null	3.63962
SEC61A1	null	null	null	3.63785
SP5	null	null	null	3.6353
NARF	null	null	null	3.63499
STIL	null	null	null	3.63359
GLI2	null	null	null	3.6332
KIFC3	null	null	null	3.63209
EMC4	null	null	null	3.63189
TMX1	null	null	null	3.63188
RCN1	null	null	null	3.62951
2013-03-01	null	null	null	3.62807
RFC3	null	null	null	3.62646
SHE	null	null	null	3.62409
THBD	null	null	null	3.6226
DNAJC5B	null	null	null	3.62246
LOC730101	null	null	null	3.6197
VAMP1	null	null	null	3.61431
APCDD1	null	null	null	3.61374
MAP3K3	null	null	null	3.6136
GTF2H5	null	null	null	3.61193
GANC	null	null	null	3.61127
ATP2B4	null	null	null	3.61003
WIPI1	null	null	null	3.60894
ARHGEF6	null	null	null	3.60555
KIAA0895	null	null	null	3.60476
CYB5R2	null	null	null	3.60354
LOC100996371	null	null	null	3.6035
IFFO1	null	null	null	3.60331
NRP2	null	null	null	3.60252
PCBP1	null	null	null	3.60183
PHF11	null	null	null	3.60115
H2AFX	null	null	null	3.60045
LOC100506100	null	null	null	3.60021
EDNRA	null	null	null	3.60016
ERG	null	null	null	3.60005
CD34	null	null	null	3.60004
INO80D	null	null	null	3.59718
SLC47A1	null	null	null	3.59658
ENOX2	null	null	null	3.59605
TP53INP1	null	null	null	3.59593
DPEP1	null	null	null	3.5948
C8orf58	null	null	null	3.59087
TLR5	null	null	null	3.58984
ZNF532	null	null	null	3.58984
SYTL3	null	null	null	3.58871
G3BP2	null	null	null	3.58794
SMURF1	null	null	null	3.58664
NLRC5	null	null	null	3.58613
ESR1	null	null	null	3.58613
SRPRB	null	null	null	3.58587
C16orf3	null	null	null	3.58249
S100A3	null	null	null	3.58215
ARL6IP5	null	null	null	3.58149
KIF20B	null	null	null	3.58003
NRD1	null	null	null	3.57947
PDGFRL	null	null	null	3.57916
UBAP2L	null	null	null	3.57725
PPIC	null	null	null	3.57697
GALNT10	null	null	null	3.57511
FOPNL	null	null	null	3.57495
F8	null	null	null	3.57464
COMMD9	null	null	null	3.56875
TM4SF18	null	null	null	3.56719
FKBP1B	null	null	null	3.56718
LRRC33	null	null	null	3.56623
RNGTT	null	null	null	3.56442
BICC1	null	null	null	3.56355
PARP8	null	null	null	3.56211
ACE2	null	null	null	3.56086
RNF38	null	null	null	3.56054
KIAA1731	null	null	null	3.55926
ZNF333	null	null	null	3.55702
FRMD6-AS1	null	null	null	3.55565
PPBP	null	null	null	3.55506
PCOLCE	null	null	null	3.5548
NDUFA4	null	null	null	3.55267
POU5F1B	null	null	null	3.55185
TBC1D7	null	null	null	3.54943
CLTA	null	null	null	3.54454
TFF2	null	null	null	3.54305
CCSAP	null	null	null	3.54245
FAM199X	null	null	null	3.54168
OSBPL8	null	null	null	3.53763
C14orf132	null	null	null	3.53704
SNX10	null	null	null	3.53682
TRAF3IP2-AS1	null	null	null	3.53633
CEP350	null	null	null	3.53564
CD81	null	null	null	3.53418
TPR	null	null	null	3.53239
PDLIM5	null	null	null	3.53202
PSMC4	null	null	null	3.53129
TUBB	null	null	null	3.52962
FAM19A5	null	null	null	3.52856
RSRC1	null	null	null	3.52732
PXK	null	null	null	3.52698
MRPL42	null	null	null	3.52671
C5orf4	null	null	null	3.52545
HMGB3P1	null	null	null	3.52454
FZD3	null	null	null	3.52265
EFCAB6	null	null	null	3.52244
ATP8B4	null	null	null	3.51956
DYNC2LI1	null	null	null	3.5174
CENPN	null	null	null	3.51679
ITGA11	null	null	null	3.512
AP1S2	null	null	null	3.51199
TNFSF8	null	null	null	3.5111
RNASE2	null	null	null	3.50967
RAB24	null	null	null	3.50942
LAMB2	null	null	null	3.5089
AFAP1L1	null	null	null	3.50863
PDK3	null	null	null	3.50844
RABGAP1L	null	null	null	3.50814
ADAM29	null	null	null	3.50707
PCDH7	null	null	null	3.50659
NFAT5	null	null	null	3.50596
MECP2	null	null	null	3.50577
BMP6	null	null	null	3.50473
ADAM33	null	null	null	3.5035
SLC6A20	null	null	null	3.4976
MAST1	null	null	null	3.49745
SLC33A1	null	null	null	3.49704
RANBP9	null	null	null	3.49665
PDPK1	null	null	null	3.49652
USP40	null	null	null	3.49631
CLEC14A	null	null	null	3.4951
PDE4DIP	null	null	null	3.49426
CLIC6	null	null	null	3.4941
LARP7	null	null	null	3.49263
ZMYND8	null	null	null	3.49183
SH2D2A	null	null	null	3.4915
ERVH-6	null	null	null	3.49136
CCL2	null	null	null	3.4893
RORA	null	null	null	3.48871
[truncated: 17,945 more rows]
